# Supplementary material
Source: PubMed Central journal article supplement (PMC10682959)
Supplement: joces-131-219311-s1.pdf [file joces-131-219311-s1.pdf]

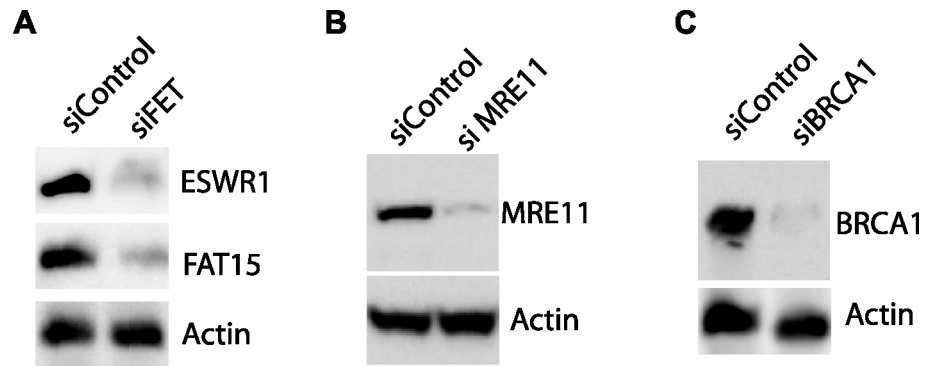

### Figure S1

Co-depletion of ESWR1 and FET by siRNA specific for FET is confirmed by western blot (A). Actin serves as a loading control. Similarly, depletion of Mre11 (B) and BRCA1 (C) by corresponding siRNAs were confirmed.

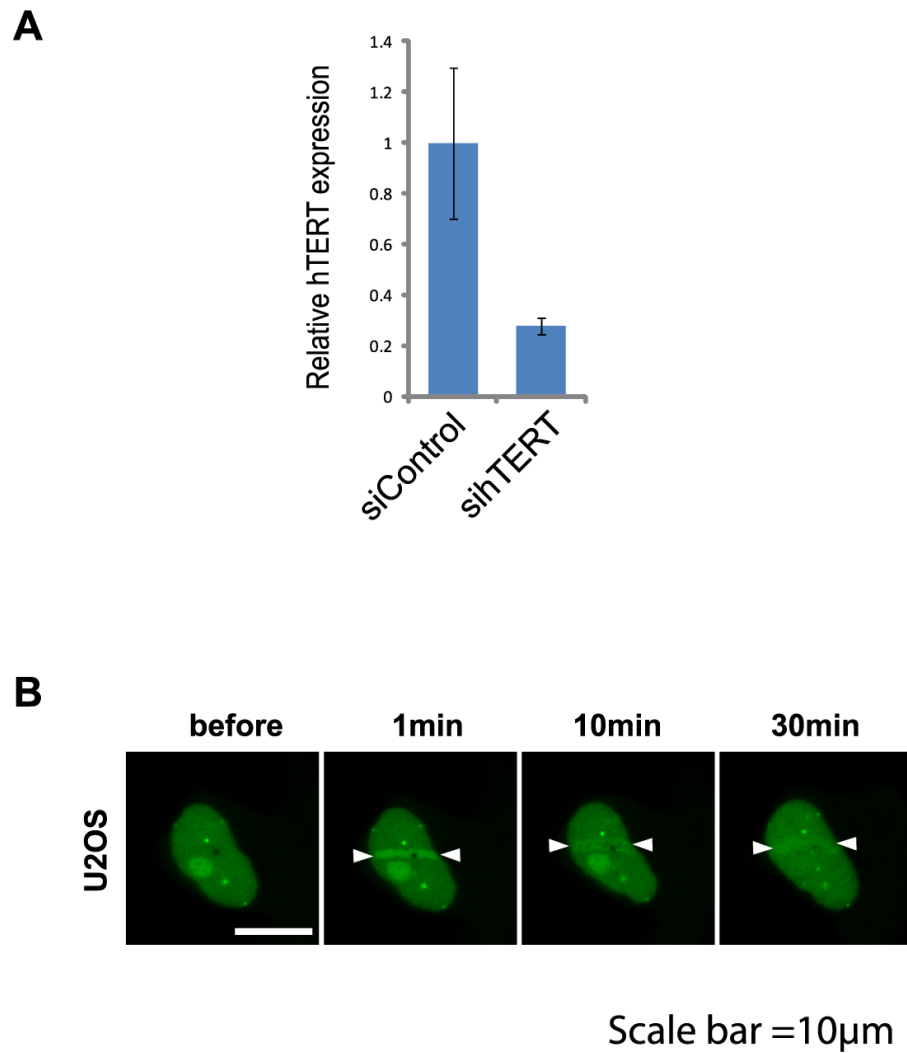

### Figure S2

**A.** RT qPCR analysis of hTERT depletion in HeLa cells. The mRNA level of hTERT was normalized to GAPDH. hTERT qPCR primers used are 5'-CGGAAGAGTGTCTGGAGCAA-3' (forward) and 5'-GGATGAAGCGGAGTCTGGA-3'(reverse) (Liu et al., 2013).

**B.** An example of the time course analysis of GFP-TRF2 recruitment to the laser-induced damage sites in U2OS cells. Scale bar=10 $\mu$ m.

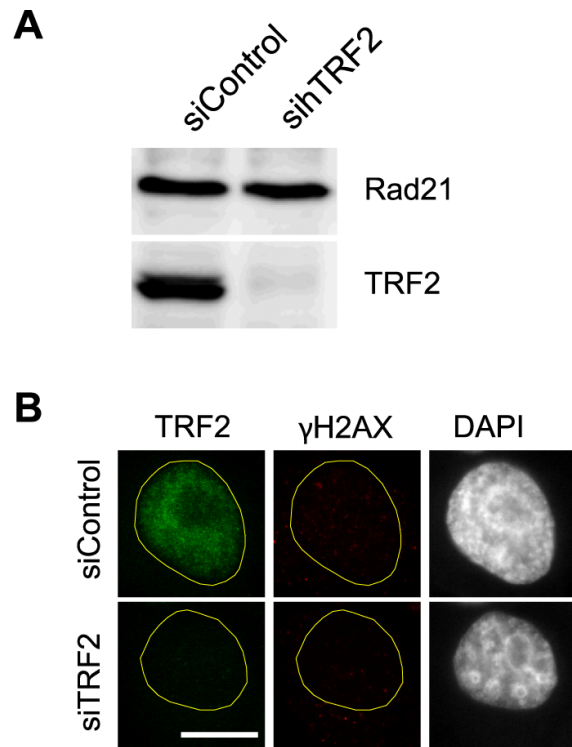

### Figure S3

**A.** Analysis of TRF2 depletion in HeLa cells after siRNA transfection by Western blot.

Total cell lysates from control or TRF2 siRNA-transfected cells were subjected to western blot analysis using anti-TRF2 antibody. Rad21 was used as a loading control.

**B.** Telomere dysfunction-induced foci (TIF) analysis. Cells were treated with control or TRF2 siRNA and were fixed at 48hrs after 2nd siRNA transfection. Cells were stained with antibodies specific for TRF2 and  $\gamma$ H2AX, and DAPI as indicated at the top. TRF2 depleted cells didn't show any increase of  $\gamma$ H2AX foci indicative of TIF.
